# Supplementary material for: Network Analysis Reveals Tumor Suppressor lncRNA GAS5 Acts as a Double-edged Sword in Gastric Cancer
Source: Research Square preprint supplement (doi:10.21203/rs.3.rs-1599866/v1), 2022-05-10
Supplement: Supplementary file 1 [file 8e35fbaf17aee30947ef50d6.xlsx]

## Sheet: Sheet1
	Logical rules that control node states of the model in Fig. 1 (highlighted in green) in terms of the state of its regulators. The left-hand side lists the official names of the molecules (target node) (highlighted in cream color), while the right-hand side lists the references of each upcoming interaction to the target node.
	Oﬃcial names of the molecules		Target node	Interactions	Descriptions	PuBMed References
	ATM serine/threonine kinase		ATM	DNA_Damage	DNA damage directly activates ATM	PMID: 31210753
				HDAC1	HDAC1 directly inhibits ATM	PMID: 23939379
				Wip1	Wip1 directly inhibits ATM	PMID: 17685927
			Rule	DNA_damage AND (NOT Wip1 OR NOT HDAC1)		ATM can be activated in the occupation of DNA damage while in the absence of Wip1 and HDAC1.
	Mitogen-activated protein kinase 14		p38 MAPK	ATM	ATM directly activates p38MAPK	PMID: 12970909
			Rule	ATM		p38 MAPK can be activated in the presence of ATM.
	Growth arrest-specific transcript		lncRNA GAS5	DNA_damage	DNA damage can activates lncRNA GAS5	PMID: 32945519
			Rule	DNA damage		lncRNA GAS5 can be activated upon DNA damage.
	microRNA-34c		miR-34c	ATM	ATM can activate miR-34c expression	PMID: 26996824
				p38 MAPK	p38 MAPK pathway can induces miR-34c	PMID: 20212154
				E2F1	E2F1 directly inhibits miR-34c expression	PMID: 32089626
			Rule	(ATM OR p38MAPK) AND NOT E2F1		ATM and p38 MAPK can trigger the activation of miR-34c whereas E2F1 directly inhibits miR-34c expression.
	Histone deacetylase 1		HDAC1	miR-34c	HDAC1 is a direct target of miR-34c	PMID: 23836017
				Sirt1	SIRT1 inhibits HDAC1 expression	PMID: 25950477
				DNA damage	DNA Damage directly inhibits HDAC1	PMID: 23088869
			Rule	(NOT miR-34c AND NOT Sirt1) OR NOT DNA_damage		HDAC1 can be activated only in the absence of miR-34c or in the absence of Sirt1 and in the absence of DNA Damage.
	Myc proto-oncogene protein		Myc	miR-34c	Myc is a direct target of miR-34c	PMID: 20603603
				RB1	RB1 directly inhibits Myc expression	PMID: 28280720
				p21	p21 directly inhibits Myc	PMID: 19440234
				p38MAPK	p38MAPK can activates Myc	PMID: 16365184
			Rule	(p38MAPK OR NOT miR_34c) AND NOT RB1 AND NOT p21		Myc can be activated in the presence of p38 MAPK or the lack of miR-34c and the deficiency of RB1 and the lack of p21.
	Tumor supressor p53 protein		p53	ATM	ATM activates p53 transcription	PMID: 27612029
				p38MAPK	p38MAPK activates p53	PMID: 29751559
				GAS5	lncRNA GAS5 induces p53 expression	PMID: 31530437
				Mdm2	Mdm2 inhibits p53	PMID: 20020415
			Rule	(ATM OR GAS5) AND NOT Mdm2 AND p38MAPK		p53 activated in the presence of ATM or GAS5 and the presence of p388MAPK and the absence of Mdm2.
	E3 ubiquitin protein ligase homolog protein		Mdm2	Wip1	Wip1 negatively regulates Mdm2	PMID: 17936559
				p53	p53 activates Mdm2	PMID: 12563309
				ATM	ATM inhibits Mdm2	PMID: 16082221
				RB1	RB1 directly inhibits Mdm2 expression	PMID: 10618708
				miR-34c	Mdm2 is direct target of miR-34c	PMID: 18451145
			Rule	(NOT Wip1 OR p53) AND NOT ATM AND NOT RB1 AND NOT miR_34c		Mdm2 activated in the presence of p53 or the absence of Wip1 and the absence of ATM and the absence of RB1 and miR-34c.
	Tumor supressor p53 protein (Ser-15 and Ser-20)		p53_A	Sirt1	Sirt1 inhibits p53	PMID: 20471503
				p53	p53 phosphorylated at Ser-15 and Ser-20	PMID: 21576488
				p53_K	p53 phosphorylated at Ser-46 inhibits Ser-15 and Ser-20	PMID: 21576488
				p53INP1	Control of p53 accumulation	PMID: 21576488
			Rule	NOT Sirt1 AND NOT p53K AND (p53 OR NOT p53INP1)		p53-A can be activated in the absence of Sirt1 and in the absence of p53-K or in the presence of p53-INP1 or in the presence of p53.
	Tumor supressor p53 protein (Ser-46)		p53_K	Sirt1	Sirt1 inhibits p53	PMID: 20471503
				p53_A	p53 phosphorylated at Ser-46	PMID: 21576488
				p53	p53 phosphorylated at Ser-15 and Ser-20 inhibits Ser-46	PMID: 21576488
				Wip1	Wip1 inhibits p53	PMID: 27959454
			Rule	NOT p53_A AND (NOT Sirt_1 OR NOT Wip1) AND p53		p53-K can be activated in the absence of p53-A and in the absence of Sirt1 or in the absence of Wip1 and in the presence of p53.
	Sirtuin 1		Sirt1	E2F1	E2F1 activates Sirt1	PMID: 24020005
				miR-34c	Sirt1 is a directly target of miR-34c	PMID: 21946562
				HDAC1	HDAC1 inhibits Sirt1	PMID: 18193082
			Rule	E2F1 AND NOT (miR_34c AND HDAC1)		Sirt1 can be activated in the presence of E2F1 and in the absence of miR-34c and in the absence of HDAC1.
	Tumor protein p53 inducible nuclear protein 1		p53INP1	p53_A	p53 Ser-15 and Ser-20 activate p53-INP1	PMID: 21576488
				p53_K	p53 Ser-46 activates p53-INP1	PMID: 21576488
			Rule	p53_A OR p53_K		p53INP1 can be activated in the presence of p53-A or in the presence of p53-K.
	Protein Phosphatase 1D		Wip1	p53_A	p53 activates Wip1	PMID: 26883196
			Rule	p53_A		Wip1 can be activated in the presence of p53-A.
	Cyclin-dependent kinase inhibitor 1A		p21	p53_A	p53 activates p21	PMID: 31416295
				HDAC1	Repression of HDAC1 activates p21 expression	PMID: 26794658
				Myc	Repression of Myc activates p21 expression	PMID: 27105536
				p38MAPK	p38MAPK can activates p21	PMID: 19528229
				Caspase	Caspase3 inhibits p21	PMID: 10022118
			Rule	p53_A OR ((NOT HDAC1 OR NOT Myc) AND NOT Caspase AND p38MAPK)		p21 can be activated in the presence of p53-A or in the absence of HDAC1 or in the absence of Myc and in the absence of Caspase3 and in the presence of p38MAPK.
	Cell division cycle 25A		Cdc25A	ATM	ATM directly inhibits Cdc25A	PMID: 22263797
				miR-34c	Cdc25A is a direct target of miR-34c	PMID: 25909221
				Myc	Myc directly activates Cdc25A	PMID: 8700224
				p38MAPK	p38MAPK inhibits Cdc25A expression	PMID: 22263797
			Rule	(NOT ATM AND NOT miR_34c AND Myc) OR NOT p38MAPK		Cdc25A can be activated in the presence of Myc and in the absence of ATM and in the absence of miR-34a or in the absence of p388 MAPK.
	Cyclin-dependent kinases 4 and 6 complex/CyclinD1		CDK46_CycD	Cdc25A	Cdc25A activates CDK46-CycD	PMID: 28192398
				p21	p21 directly inhibits CDK46-CycD	PMID: 21616632
				miR-34c	CDK46-CycD is a direct target of miR-34c	PMID: 28839212
				GAS5	CDK46-CycD is a direct target of lncRNA GAS5	PMID: 24884417
			Rule	Cdc25A AND NOT (miR_34a AND p21 AND GAS5)		CDK46-CycD can be activated in the presence of Cdc25A and in the absence of miR-34a and in the absence of p21 and in the absence of GAS5.
	Cyclin-dependent kinases 2 and complex/CyclinE		CDK2_CycE	E2F1	E2F1 Activates CDK2-CycE	PMID: 29754146
				p21	p21 directly inhibits CDK2-CycE	PMID: 21616632
				miR-34c	CDK2-CycE is a direct target of miR-34c	PMID: 28839212
			Rule	E2F1 AND NOT miR_34a AND NOT p21		CDK2-CycE can be activated in the presence of Cdc25A and in the presence of E2F1 and in the absence of miR-34a and in the absence of p21.
	Retinoblastoma 1 protein		RB1	CDK46_CycD	CDK46-CycD directly inhibits RB	PMID: 12362273
				CDK2_CycE	CDK2-CycE directly inhibits RB	PMID: 12362273
				Cdc25A	RB1 is directly inhibited by Cdc25A	PMID: 30250928
				Sirt1	RB1 is directly inhibited by Sirt1	PMID: 17620057
			Rule	NOT Sirt1 AND NOT Cdc25A AND NOT CDK46_CycD AND NOT CDK2_CycE		RB can activated in the absence of CDK46-CycD and CDK2-CycE and Sirt1 and Cdc25A.
	BCL2 apoptosis regulator		BCL2	Cdc25A	BCL2 directly activated by Cdc25A	PMID: 18838868
				miR-34c	BCL2 is a direct target of miR-34c	PMID: 29435079
			Rule	Cdc25A AND NOT miR-34c		BCL2 can be activated in the presence of Cdc25A and in the absence of miR-34c.
	BCL2 associated X, apoptosis regulator		BAX	BCL2	BCL2 directly inhibits BAX	PMID: 32802314
				p53_K	p53-k activates BAX	PMID: 14963330
			Rule	NOT BCL2 AND NOT p53_K		BAX can be activated in the absence of BCL2 and in the presence of p53-K.
	E2F transcripition factor 1		E2F1	RB1	RB1 directly inhibits E2F1	PMID: 34136392
				Cdc25A	Cdc25A activates E2F1 expression	PMID: 22263797
				GAS5	E2F1 is directly target of lncRNA GAS5	PMID: 24884417
			Rule	NOT GAS5 OR (NOT RB1 AND Cdc25A)		E2F1 can be activated in the presence of Cdc25A and in the absence of RB1 or in the absence of lncRNA GAS5.
	Caspase		Caspase	BCL2	BCL2 inhibits Caspase	PMID: 10086332
				p21	p21 inhibits Caspase	PMID: 17145870
				BAX	BAX enhances Caspase activity	PMID: 9890985
			Rule	NOT (BCL2 OR p21) OR BAX		Caspase can be activated in the absence of BCL2 or in the absence of p21 or in the presence of BAX.
	Proliferation		Proliferation	CDK2_CycE	CDK2_CycE induces Proliferation	PMID: 25627202
			Rule	CDK2_CycE		CDK2-CycE induced tumorigenesis and progression in gastric cancer cells.
	Cell Cycle Arrest at G1/S checkpoint		Cycle Arrest	p21	p21 induces Cell cycle arrest	PMID: 24384380
			Rule	p21 AND NOT CDK2_CycE		Cell cycle arrest can be activated in the presence of p21.
	Apoptosis at G1/S checkpoint		Apoptosis	Caspase	Caspase induces Apoptosis	PMID: 11227675
			Rule	Caspase3 induces Apoptosis in NSCLC		Caspase can activated Apoptosis in the cancer cells, in response to DNA Damage.
